# Supplementary material for: HDAC2 and 7 down-regulation induces senescence in dermal fibroblasts
Source: publisher site journal article supplement (doi:10.18632/aging.203304), 2021-07-12
Supplement: Supplementary file [file aging-v13i14-203304-supplementary-material-SD1.pdf]

## **SUPPLEMENTARY METHOD**

### **MTT assay**

AG04431 HDFs were treated with 0, 5 or 10  $\mu$ M SAHA (Selleckchem) during 24, 48 or 72 hours and MTT assay was performed every 24 hours. Cells were incubated with MTT (Sigma-Aldrich) during 2 hours and then lysed in dimethylsulfoxide (DMSO, Carl Roth). The absorbance was read with a spectrometer at 570 nm.
