# Supplementary material for: HDAC2 and 7 down-regulation induces senescence in dermal fibroblasts
Source: publisher site journal article supplement (doi:10.18632/aging.203304), 2021-07-12
Supplement: Supplementary file [file aging-v13i14-203304-supplementary-material-SD3.pdf]

## SUPPLEMENTARY TABLES

**Supplementary Table 1. Primers used for RT-qPCR.**

| Abbreviation         | Genes                                      | Forward primer (5'-3')          | Reverse Primer (5'-3')            |
|----------------------|--------------------------------------------|---------------------------------|-----------------------------------|
| CLU                  | Apolipoprotein J                           | GGA TGA AGG ACC AGT GTG ACA AG  | CAG CGA CCT GGA GGG ATT C         |
| GAPDH                | Glyceraldehyde-3-Phosphate dehydrogenase   | ACC CAC TCC TCC ACC TTT GAC     | GTC CAC CAC CCT GTT GCT GTA       |
| HDAC 1               | Histone deacetylase 1                      | CTA TCA AAG GAC ACG CCA AGT G   | ACC GGG CAA CGT TAC GAA T         |
| HDAC 2               | Histone deacetylase 2                      | CAT GGT GAT GGT GTT GAA GAA G   | TCA TTG GAA AAT TGA CAG CAT AGT   |
| HDAC 3               | Histone deacetylase 3                      | TTG AGT TCT GCT CGC GTT ACA     | CCC AGT TAA TGG CAA TAT CAC AGA T |
| HDAC 4               | Histone deacetylase 4                      | GTA AGA AAC TTC TAG GCT CGC TC  | ACC TCG TTC CAT ATG GTG TCA       |
| HDAC 5               | Histone deacetylase 5                      | TTG GAG ACG TGG AGT ACC TTA CAG | GAC TAG GAC CAC ATC AGG TGA GAA C |
| HDAC 6               | Histone deacetylase 6                      | TGG CTA TTG CAT GTT CAA CCA     | GTC GAA GGT GAA CTG TGT TCC T     |
| HDAC 7               | Histone deacetylase 7                      | CTG GCA CAG CGG ATG TTT G       | CTG CAT TGG AGG AAT GAA GCT       |
| IL-6                 | Interleukin-6                              | TCC AGG AGC CCA GCT ATG AA      | CCC AGG GAG AAG GCA ACT G         |
| IL-8                 | Interleukine-8                             | CTG GCC GTG GCT CTC TTG         | GGG TGG AAA GGT TTG GAG TAT G     |
| MMP-1                | Metalloproteinase-1                        | CAT GCG CAC AAA TCC CTT CTA     | GAA CAG CCC AGT ACT TAT TCC CTT T |
| MMP-3                | Metalloproteinase-3                        | TTT GGC CCA TGC CTA TGC         | CCA GGG AGT GGC CAA TTT C         |
| p21 <sup>WAF1</sup>  | Cyclin-dependent Kinase Inhibitor 1        | CTG GAG ACT CTC AGG GTC GAA     | CCA GGA CTG CAG GCT TCC T         |
| p16 <sup>INK4a</sup> | Cyclin-dependent Kinase Inhibitor 2a       | GCC CAA CGC ACC GAA TAG T       | CGC TGC CCA TCA TCA TGA C         |
| LMNB1                | Lamin B1                                   | ACTGGCGAAGATGTGAAGGTTAT         | CCCTGCTGGTGGAAAAGTTC              |
| IL-1 $\beta$         | Interleukine-1 $\beta$                     | GCCCTAAACAGATGAAGTGCTC          | GAGATTCGTAGCTGGATGCC              |
| CXCL1                | Chemokine (C-X-C) motif 1 (Gro- $\alpha$ ) | CGAAAAGATGCTGAACAGTGAC          | ACATTAGGCACAATCCAGGTG             |

**Supplementary Table 2. Antibodies used for western blotting and immunofluorescence.**

| <b>Antibody</b>                 | <b>Firm</b>               | <b>Isotype</b> | <b>Source</b> | <b>Dilution</b> | <b>Code</b> |
|---------------------------------|---------------------------|----------------|---------------|-----------------|-------------|
| HDAC 1                          | Cell Signaling Technology | Monoclonal     | Mouse         | 1/1000          | 1OE2 #5356  |
| HDAC 2                          | Cell Signaling Technology | Monoclonal     | Mouse         | 1/1000          | 3F3 #2540   |
| HDAC 3                          | Cell Signaling Technology | Monoclonal     | Mouse         | 1/1000          | 7G6C5 #3949 |
| HDAC 4                          | Cell Signaling Technology | Monoclonal     | Rabbit        | 1/1000          | D15C3 #7628 |
| HDAC 5                          | Cell Signaling Technology | Monoclonal     | Rabbit        | 1/500           | D17V #2082  |
| HDAC 6                          | Cell Signaling Technology | Monoclonal     | Rabbit        | 1/1000          | D2E5 #7558  |
| HDAC 7                          | Cell Signaling Technology | Monoclonal     | Rabbit        | 1/1000          | D4E1L#33418 |
| GAPDH                           | Abcam                     | Monoclonal     | Rabbit        | 1/10 000        | EPR6256     |
| p16 <sup>INK4a</sup>            | Abcam                     | Monoclonal     | Rabbit        | 1/2000          | #108349     |
| p21 <sup>WAF1</sup>             | Cell Signaling Technology | Monoclonal     | Mouse         | 1/1000          | DCS60 #2946 |
| Histone H3 (Pan-Acetyl)         | Active Motif              | Polyclonal     | Rabbit        | 1/1000          | 39139       |
| Acetylated lysine               | Cell Signaling Technology | Polyclonal     | Rabbit        | 1/1000          | #9441       |
| Histone H3                      | Cell Signaling Technology | Polyclonal     | Rabbit        | 1/1000          | #9715       |
| IκBα                            | Santa Cruz Technology     | Monoclonal     | Rabbit        | 1/500           | #sc-1643    |
| Alpha-tubulin                   | Sigma                     | Monoclonal     | Mouse         | 1/20 000        | T5168       |
| IRDye800CW Goat anti-mouse IgG  | LI-COR                    | Polyclonal     | Goat          | 1/10 000        | #926-32210  |
| IRDye800CW Goat anti-rabbit IgG | LI-COR                    | Polyclonal     | Goat          | 1/10 000        | #926-32211  |
| HDAC7                           | Cell Signaling Technology | Monoclonal     | Rabbit        | 1/100           | D4E1L#33418 |
| HDAC2                           | Cell Signaling Technology | Monoclonal     | Mouse         | 1/400           | 3F3 #2540   |
| Ki-67                           | Cell Signaling Technology | Monoclonal     | Mouse         | 1/800           | #9449       |
| p65                             | Cell Signaling Technology | Monoclonal     | Rabbit        | 1/400           | #8242       |
| Anti-mouse Alexa 488nm          | Molecular Probes          | Polyclonal     | Goat          | 1/1000          | #A-11001    |
| Anti-rabbit Alexa 488nm         | Molecular Probes          | Polyclonal     | Goat          | 1/1000          | #A-11008    |
